# Supplementary material
Source: Springer Nature journal article supplement (https://www.springermedizin.de/resource/supplementary/13099_2014_154_MOESM4_ESM.pdf/9665662)
Supplement: MOESM4 [file 9665662]

### Subsystem Coverage

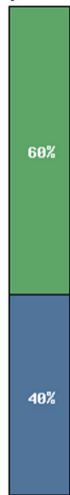

### Subsystem Category Distribution

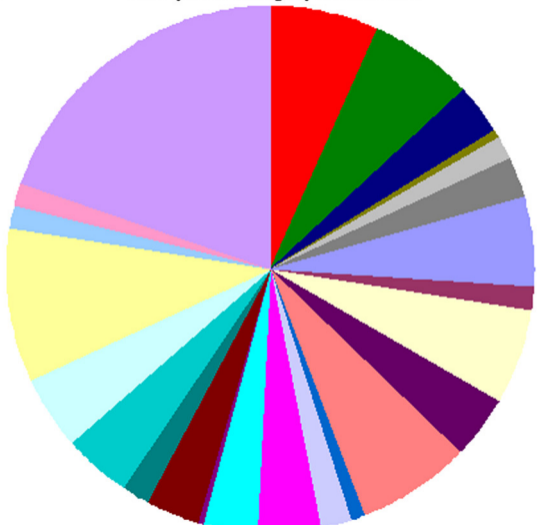

### Subsystem Feature Counts

- ⊕ Cofactors, Vitamins, Prosthetic Groups, Pigments (295)
- ⊕ Cell Wall and Capsule (275)
- ⊕ Virulence, Disease and Defense (120)
- ⊕ Potassium metabolism (31)
- ⊕ Photosynthesis (0)
- ⊕ Miscellaneous (52)
- ⊕ Phages, Prophages, Transposable elements, Plasmids (108)
- ⊕ Membrane Transport (248)
- ⊕ Iron acquisition and metabolism (57)
- ⊕ RNA Metabolism (247)
- ⊕ Nucleosides and Nucleotides (163)
- ⊕ Protein Metabolism (300)
- ⊕ Cell Division and Cell Cycle (38)
- ⊕ Motility and Chemotaxis (83)
- ⊕ Regulation and Cell signaling (163)
- ⊕ Secondary Metabolism (5)
- ⊕ DNA Metabolism (143)
- ⊕ Regulons (12)
- ⊕ Fatty Acids, Lipids, and Isoprenoids (142)
- ⊕ Nitrogen Metabolism (72)
- ⊕ Dormancy and Sporulation (7)
- ⊕ Respiration (181)
- ⊕ Stress Response (188)
- ⊕ Metabolism of Aromatic Compounds (3)
- ⊕ Amino Acids and Derivatives (410)
- ⊕ Sulfur Metabolism (58)
- ⊕ Phosphorus Metabolism (51)
- ⊕ Carbohydrates (829)
